# Supplementary material for: Cost per Event Averted in Cancer Trials in the Adjuvant Setting From 2018 to 2022
Source: PubMed Central journal article supplement (PMC9187950; doi:10.1001/jamanetworkopen.2022.16058), 2022-06-10
Supplement: jamanetwopen-e2216058-s001.pdf [file jamanetwopen-e2216058-s001.pdf]

## Supplemental Online Content

Mousavi I, Olivier T, Prasad V. Cost per event averted in cancer trials in the adjuvant setting from 2018 to 2022. *JAMA Netw Open.* 2022;5(6):e2216058.  
doi:10.1001/jamanetworkopen.2022.16058

### **eAppendix.** Cost per Event Averted Example Calculation

This supplemental material has been provided by the authors to give readers additional information about their work.

## eAppendix: Cost Per Event Averted Example Calculation

- Example Calculation for Cost per Event Averted:
  - IMpower10 Trial - 3 yr (36 month) DFS endpoint (Intention-to-Treat population)
    - $NNT = 1/ARR$ 
      - % of ITT population in experimental group = 57.9%
      - % of ITT population in control group = 52.6%
    - $NNT = 18.9$ 
      - $1/(ER_{treatment} - ER_{control}) = NNT$
    - Median treatment duration = 10.4 months
    - Monthly cost of atezolizumab = \$11,363.82
    - Cost per patient =  $(11,363.82 * 10.4) = \$118,183.728$
  - Cost per event averted =  $NNT * \text{cost per patient} = 18.9 * 118,183.728 = \$2,233,672.4592$  (rounded = **\$2,230,000**)
